# Supplementary material for: CNS Invasion in Meningioma—How the Intraoperative Assessment Can Improve the Prognostic Evaluation of Tumor Recurrence
Source: PubMed Central journal article supplement (PMC7761660; doi:10.3390/cancers12123620), 2020-12-03

# Supplementary Materials: CNS Invasion in Meningioma—How the Intraoperative Assessment Can Improve the Prognostic Evaluation of Tumor Recurrence

Felix Behling, Christina Fodi, Irina Gefpner-Tuma, Kathrin Machetanz, Mirjam Renovanz, Marco Skardelly, Antje Bornemann, Jürgen Honegger, Ghazaleh Tabatabai, Marcos Tatagiba and Jens Schittenhelm

**Table S1.** Cohort characteristics and univariate analysis of tumor recurrence restricted to cases treated after the implementation of the WHO classification of 2007 (Chi-Square test).

| Variable                                                           | N (%)       | Complete Cohort        |            | p-value  | 5-year Follow-up Cohort |                        | p-value    |          |
|--------------------------------------------------------------------|-------------|------------------------|------------|----------|-------------------------|------------------------|------------|----------|
|                                                                    |             | Tumor Recurrence N (%) |            |          | N (%)                   | Tumor Recurrence N (%) |            |          |
|                                                                    |             | Yes                    | No         |          | Yes                     | No                     |            |          |
| Gender                                                             |             |                        |            |          |                         |                        |            |          |
| Female                                                             | 895 (73.6)  | 114 (12.7)             | 781 (87.3) | .0001*   | 277 (70.7)              | 114 (41.2)             | 163 (58.9) | .0004*   |
| Male                                                               | 321 (26.4)  | 70 (21.8)              | 251 (78.2) |          | 115 (29.3)              | 70 (60.9)              | 45 (39.1)  |          |
| Tumor localization                                                 |             |                        |            |          |                         |                        |            |          |
| Skull base                                                         | 633 (52.1)  | 109 (17.2)             | 524 (82.8) | .0007*   | 212 (54.1)              | 109 (51.4)             | 103 (48.6) | .0140*   |
| Convexity/falx                                                     | 456 (37.5)  | 70 (15.4)              | 386 (84.7) |          | 156 (39.8)              | 70 (44.9)              | 86 (55.1)  |          |
| Spinal                                                             | 127 (10.4)  | 5 (3.9)                | 122 (96.1) |          | 24 (6.1)                | 5 (20.8)               | 19 (79.2)  |          |
| Simpson grade                                                      |             |                        |            |          |                         |                        |            |          |
| 1                                                                  | 286 (24.1)  | 24 (8.4)               | 262 (91.6) | < .0001* | 76 (20.0)               | 24 (31.6)              | 52 (68.4)  | < .0001* |
| 2                                                                  | 332 (28.0)  | 19 (5.7)               | 313 (94.3) |          | 72 (19.0)               | 19 (26.4)              | 53 (73.6)  |          |
| 3                                                                  | 248 (20.9)  | 39 (15.7)              | 209 (84.3) |          | 84 (22.1)               | 39 (46.4)              | 45 (53.6)  |          |
| 4                                                                  | 319 (26.9)  | 99 (31.0)              | 220 (69.0) |          | 148 (39.0)              | 99 (66.9)              | 49 (33.1)  |          |
| 5                                                                  | 0 (-)       | 0 (-)                  | 0 (-)      |          | 0 (-)                   | 0 (-)                  | 0 (-)      |          |
| CNS invasion by histopathological assessment                       |             |                        |            |          |                         |                        |            |          |
| Yes                                                                | 63 (5.2)    | 21 (33.3)              | 42 (66.7)  | < .0001* | 29 (7.4)                | 21 (72.4)              | 8 (27.6)   | .0043*   |
| No                                                                 | 1153 (94.8) | 163 (14.1)             | 990 (85.9) |          | 363 (92.6)              | 163 (44.9)             | 200 (55.1) |          |
| CNS invasion by intraoperative assessment                          |             |                        |            |          |                         |                        |            |          |
| Yes                                                                | 275 (23.5)  | 51 (18.6)              | 224 (81.5) | .0454*   | 96 (26.0)               | 51 (53.1)              | 45 (46.9)  | .1542    |
| No                                                                 | 894 (76.5)  | 122 (13.7)             | 772 (86.4) |          | 273 (74.0)              | 122 (44.7)             | 151 (55.3) |          |
| CNS invasion by combined assessment                                |             |                        |            |          |                         |                        |            |          |
| Yes                                                                | 301 (25.8)  | 60 (19.9)              | 241 (80.1) | .0036*   | 108 (29.3)              | 60 (55.6)              | 48 (44.4)  | .0318*   |
| No                                                                 | 868 (74.3)  | 113 (13.0)             | 755 (87.0) |          | 261 (70.7)              | 113 (43.3)             | 148 (56.7) |          |
| CNS invasion intraoperatively not seen on histopathology           |             |                        |            |          |                         |                        |            |          |
| Yes                                                                | 238 (20.4)  | 39 (16.4)              | 199 (83.6) | .4396    | 79 (21.4)               | 39 (49.4)              | 40 (50.6)  | .6178    |
| No                                                                 | 931 (76.6)  | 134 (14.4)             | 797 (85.6) |          | 290 (78.6)              | 134 (46.2)             | 156 (53.8) |          |
| CNS invasion double positive (histopathology and intraoperatively) |             |                        |            |          |                         |                        |            |          |
| Yes                                                                | 37 (3.2)    | 12 (32.4)              | 25 (67.6)  | .0021*   | 17 (4.6)                | 12 (70.6)              | 5 (29.4)   | .0449*   |
| No                                                                 | 1132 (96.8) | 161 (14.2)             | 971 (85.8) |          | 352 (95.4)              | 161 (45.7)             | 191 (54.3) |          |

|                    | Yes         | No         |            |         |            |            |            |         |
|--------------------|-------------|------------|------------|---------|------------|------------|------------|---------|
| WHO Classification | 1066 (87.7) | 129 (12.1) | 937 (87.9) | <.0001* | 311 (79.3) | 129 (41.5) | 182 (58.5) | <.0001* |
| 2007               | 147 (12.1)  | 53 (36.1)  | 94 (64)    |         | 79 (20.2)  | 53 (67.1)  | 26 (32.9)  |         |
| I                  | 3 (0.3)     | 2 (66.7)   | 1 (33.3)   |         | 2 (0.5)    | 2 (100.0)  | 0 (0)      |         |
| II                 |             |            |            |         |            |            |            |         |
| III                |             |            |            |         |            |            |            |         |
| WHO Classification | 1035 (85.1) | 122 (11.8) | 913 (88.2) | <.0001* | 300 (76.5) | 122 (40.7) | 178 (59.3) | <.0001* |
| 2016               | 178 (14.6)  | 60 (33.7)  | 118 (66.3) |         | 90 (23.0)  | 60 (66.7)  | 30 (33.3)  |         |
| I                  | 3 (0.3)     | 2 (66.7)   | 1 (33.3)   |         | 2 (0.5)    | 2 (100.0)  | 0 (0)      |         |
| II                 |             |            |            |         |            |            |            |         |
| III                |             |            |            |         |            |            |            |         |

Asterisk (\*): statistically significant result.

**Table S2.** Characteristics of meningiomas with invasive growth according to the type of assessment (Chi-Square test).

|                    | N (%)      | CNS Invasion              |                           |                     | p-value  |
|--------------------|------------|---------------------------|---------------------------|---------------------|----------|
|                    |            | Histopathology Assessment | Intraoperative Assessment | By Both Assessments |          |
| Gender             |            |                           |                           |                     |          |
| Female             | 245 (65.9) | 11 (40.7)                 | 208 (69.6)                | 26 (56.5)           |          |
| Male               | 127 (34.1) | 16 (59.3)                 | 91 (30.4)                 | 20 (43.5)           |          |
| Tumor localization |            |                           |                           |                     |          |
| Skull base         | 142 (38.2) | 15 (55.6)                 | 117 (39.1)                | 10 (21.7)           | 0.0037*  |
| Convexity/falx     | 226 (60.8) | 12 (44.4)                 | 178 (59.5)                | 36 (78.3)           |          |
| Spinal             | 4 (1.1)    | 0 (–)                     | 4 (1.3)                   | 0 (–)               |          |
| WHO classification |            |                           |                           |                     |          |
| 2007               |            |                           |                           |                     | 0.0402*  |
| I                  | 271 (72.9) | 15 (55.6)                 | 240 (80.3)                | 16 (34.8)           |          |
| II                 | 100 (26.9) | 12 (44.4)                 | 58 (19.4)                 | 30 (65.2)           |          |
| III                | 1 (0.3)    | 0 (–)                     | 1 (0.3)                   | 0 (–)               |          |
| Histology          |            |                           |                           |                     |          |
| I                  |            |                           |                           |                     | <0.0001* |
| Angiomatous        | 7 (1.9)    | 0 (–)                     | 7 (2.3)                   | 0 (–)               | <0.0001* |
| Fibroblastic       | 17 (4.6)   | 0 (–)                     | 16 (5.4)                  | 1 (2.2)             |          |
| Lymphocyte rich    | 0 (–)      | 0 (–)                     | 0 (–)                     | 0 (–)               |          |
| Meningothelial     | 157 (42.2) | 4 (14.8)                  | 144 (48.2)                | 9 (19.6)            |          |
| Metaplastic        | 5 (1.3)    | 1 (3.7)                   | 4 (1.3)                   | 0 (–)               |          |
| Microcystic        | 11 (3.0)   | 0 (–)                     | 11 (3.7)                  | 0 (–)               |          |
| Psammomatous       | 9 (2.4)    | 0 (–)                     | 9 (3.0)                   | 0 (–)               |          |
| Secretory          | 16 (4.3)   | 2 (7.4)                   | 13 (4.4)                  | 1 (2.2)             |          |
| Transitional       | 32 (8.6)   | 1 (3.7)                   | 31 (10.4)                 | 0 (–)               |          |
| NOS                | 17 (4.6)   | 7 (25.9)                  | 5 (1.7)                   | 5 (10.9)            |          |
| II                 |            |                           |                           |                     |          |
| Atypical           | 94 (25.3)  | 12 (44.4)                 | 52 (17.4)                 | 30 (65.2)           |          |
| Chordoid           | 6 (1.6)    | 0 (–)                     | 6 (2.0)                   | 0 (–)               |          |
| Clear Cell         | 0 (–)      | 0 (–)                     | 0 (–)                     | 0 (–)               |          |
| III                |            |                           |                           |                     |          |
| Anaplastic         | 0 (–)      | 0 (–)                     | 0 (–)                     | 0 (–)               |          |
| Papillary          | 0 (–)      | 0 (–)                     | 0 (–)                     | 0 (–)               |          |
| Rhabdoid           | 1 (0.3)    | 0 (–)                     | 1 (0.3)                   | 0 (–)               |          |

Asterisk (\*): statistically significant result.

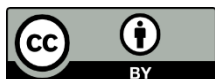

Supplement: cancers-12-03620-s001.pdf [file cancers-12-03620-s001.pdf]
